# Supplementary material for: Visual Sequelae of Computer Vision Syndrome: A Cross-Sectional Case-Control Study
Source: J Ophthalmol. 2021 Apr 2;2021:6630286. doi: 10.1155/2021/6630286 (PMC8035040; doi:10.1155/2021/6630286)
Supplement: Supplementary Materials — S1 appendix: CVS-F3. S2 appendix: multivariate logistic regression analysis of factors affecting the occurrence of dry eye. S3 appendix: final multivariate logistic regression analysis of factors the affecting occurrence of dry eye. S4 appendix: univariate linear regression analysis of factors affecting the total number of symptoms. [file 6630286.f1.zip]

Archive with 4 entries (4 files):
- 6630286.f1/S1 Appendix. CVS-F3.docx
- 6630286.f1/S2 Appendix. Multivariate logistic regression analysis of factors affecting the occurrence of dry eye.docx
- 6630286.f1/S3 Appendix. Final multivariate logistic regression analysis of factors the affecting occurrence of dry eye.docx
- 6630286.f1/S4 Appendix. Univariate linear regression analysis of factors the affecting total number of symptoms.docx
